# Supplementary material
Source: PubMed Central journal article supplement (PMC4096836)
Supplement: NIHMS449974-supplement-None.pdf [file NIHMS449974-supplement-None.pdf]

Design, synthesis and evaluation of estradiol-linked genotoxicants as anticancer agents.

Supplementary material - NONE
